# Supplementary material for: Land-Use-Change-Induced Cooling and Precipitation Reduction in China: Insights from CMIP6 Models
Source: MDPI journal article supplement (doi:10.3390/su151612191), 2023-08-09
Supplement: s1 [file s1]

Archive with 1 entries (1 files):
- sustainability-2539286-supplementary.pdf
